# Supplementary material for: Umbilical cord-derived mesenchymal stromal cells preserve endogenous insulin production in type 1 diabetes: a Phase I/II randomised double-blind placebo-controlled trial
Source: PubMed Central journal article supplement (PMC10317874; doi:10.1007/s00125-023-05934-3), 2023-05-24
Supplement: 125_2023_5934_MOESM1_ESM.pdf [file 125_2023_5934_MOESM1_ESM.pdf]

**ESM Table 1: Visit schedule**

|                           | <b>1</b>        | <b>2</b>       | <b>3</b>         | <b>4</b>          | <b>5</b>           | <b>6</b>             | <b>7</b>             | <b>8</b>             |
|---------------------------|-----------------|----------------|------------------|-------------------|--------------------|----------------------|----------------------|----------------------|
|                           | Screening visit | Baseline visit | Treatment        |                   |                    |                      |                      |                      |
| Days                      | -14 -0          | 0              | 7<br>(+/- 3days) | 37<br>(+/- 3days) | 97<br>(+/- 7 days) | 187<br>(+/- 14 days) | 277<br>(+/- 14 days) | 372<br>(+/- 14 days) |
| Informed consent          | x               |                |                  |                   |                    |                      |                      |                      |
| Eligibility criteria      | x               |                |                  |                   |                    |                      |                      |                      |
| Demography                | x               |                |                  |                   |                    |                      |                      |                      |
| Medical history           | x               |                |                  |                   |                    |                      |                      |                      |
| Concomitant medications   | x               | x              | x                | x                 | x                  | x                    | x                    | x                    |
| Baseline symptoms         | x               | x              |                  |                   |                    |                      |                      |                      |
| Adverse events            |                 | x              | x                | x                 | x                  | x                    | x                    | x                    |
| Optimising diabetes care  | x               | x              | x                | x                 | x                  | x                    | x                    | x                    |
| Randomisation             |                 | x              |                  |                   |                    |                      |                      |                      |
| Insulin requirement       |                 | x              | x                | x                 | x                  | x                    | x                    | x                    |
| MMTT                      |                 | x              |                  |                   |                    |                      |                      | x                    |
| CGM                       |                 | x              |                  |                   |                    |                      |                      | x                    |
| ProTrans/placebo infusion |                 |                | x                |                   |                    |                      |                      |                      |
| DTSQ                      |                 | x              |                  |                   |                    |                      |                      | x                    |
| Immunology tests          |                 | x              |                  | x                 |                    |                      |                      | x                    |
| Clinical chemistry        | x               | x              |                  | x                 | x                  | x                    | x                    | x                    |
| HLA class I genotype      |                 | x              |                  |                   |                    |                      |                      |                      |
| HbA1c                     | x               | x              |                  | x                 | x                  | x                    | x                    | x                    |

|                                      |   |   |   |   |   |   |   |   |
|--------------------------------------|---|---|---|---|---|---|---|---|
| Pregnancy test (HCG)                 | x |   |   |   |   |   |   |   |
| Vital signs (heart rate, BP)         | x | x | x | x | x | x | x | x |
| Dispensing diary card                |   | x | x | x | x | x | x |   |
| Collecting diary card                |   |   | x | x | x | x | x | x |
| Physical examination                 | x | x | x | x | x | x | x | x |
| Detailed neurological examination    | x | x | x | x | x | x | x | x |
| Cardiovascular examination incl. ECG | x | x | x | x | x | x | x | x |
| Ophthalmological examination         | x |   |   | x |   |   |   | x |

**ESM Table 2:** Summary of all adverse events during both parts of the trial

| <b>MedDRA Preferred term</b>             | <b>Grade I</b> | <b>Grade II</b> | <b>Grade III</b> | <b>Grade IV</b> | <b>Frequency</b> |
|------------------------------------------|----------------|-----------------|------------------|-----------------|------------------|
| Headache                                 | x              |                 |                  |                 | < 5 %            |
| Nasopharyngitis                          | x              |                 |                  |                 | < 20 %           |
| Nasopharyngitis                          |                | x               |                  |                 | < 15 %           |
| Nasopharyngitis                          |                |                 | x                |                 | < 5 %            |
| Influenza                                | x              |                 |                  |                 | < 5 %            |
| Respiratory disorder                     | x              |                 |                  |                 | < 5 %            |
| Food poisoning with vomiting             | x              |                 |                  |                 | < 5 %            |
| Gastroenteritis                          |                | x               |                  |                 | < 5 %            |
| Abdominal pain upper                     |                | x               |                  |                 | < 5 %            |
| Glomerular filtration rate decreased     | x              |                 |                  |                 | < 10 %           |
| Liver function test abnormal             | x              |                 |                  |                 | < 5 %            |
| Cystatin C                               | x              |                 |                  |                 | < 5 %            |
| Electrocardiogram QTc interval prolonged | x              |                 |                  |                 | < 5 %            |
| Tingling sensation                       | x              |                 |                  |                 | < 5 %            |
| Anxiety                                  | x              |                 |                  |                 | < 5 %            |
| Nasal injury                             | x              |                 |                  |                 | < 5 %            |
| Limb injury                              | x              |                 |                  |                 | < 5 %            |
| Back pain                                | x              |                 |                  |                 | < 5 %            |
| Conjunctivitis                           | x              |                 |                  |                 | < 5 %            |
| Fatigue                                  | x              |                 |                  |                 | < 5 %            |
| Lymphadenopathy                          | x              |                 |                  |                 | < 5 %            |
| Iron deficiency anemia                   | x              |                 |                  |                 | < 5 %            |
| Cervix carcinoma stage 0                 | x              |                 |                  |                 | < 10 %           |
| Pregnancy                                |                | x               |                  |                 | < 5 %            |

**ESM Table 3:** Summary of all adverse events per group as reported

| Part A                            | At infusion<br>(within 24 h) | During 12<br>months | Patients<br>affected |
|-----------------------------------|------------------------------|---------------------|----------------------|
| <b>Low dose (n=3)</b>             |                              |                     |                      |
| Common cold                       | 0                            | 3                   | 2                    |
| Tingling/numbness                 | 0                            | 1                   | 1                    |
| Symptoms of stress                | 0                            | 1                   | 1                    |
| Elevated P-ASAT                   | 0                            | 1                   | 1                    |
| Elevated P-LSAT                   | 0                            | 1                   | 1                    |
| Food poison, vomit                | 0                            | 1                   | 1                    |
|                                   |                              |                     |                      |
| <b>Medium dose (n=3)</b>          |                              |                     |                      |
| Common cold                       | 0                            | 8                   | 2                    |
| Unilateral conjunctival injection | 0                            | 1                   | 1                    |
| Stomach flu                       | 0                            | 1                   | 1                    |
| Lumbago                           | 0                            | 1                   | 1                    |
| Erythema after freestyle libre    | 0                            | 1                   | 1                    |
| Pollen allergy                    | 0                            | 1                   | 1                    |
|                                   |                              |                     |                      |
| <b>High (high dose (n=3)</b>      |                              |                     |                      |
| Common cold                       | 0                            | 4                   | 2                    |
| Smell of corn                     | 1                            | 0                   | 1                    |
| Headache                          | 1                            | 0                   | 1                    |
| Chlamydia infection               | 0                            | 1                   | 1                    |
| GFR <80                           | 0                            | 1                   | 1                    |
| Weight gain                       | 0                            | 1                   | 1                    |
| Hair loss                         | 0                            | 1                   | 1                    |
| Dry skin with eczema head         | 0                            | 1                   | 1                    |
| Numbness in hands while sleeping  | 0                            | 1                   | 1                    |

| Part B                             | At infusion<br>(within 24 h) | During 12<br>months | Patients<br>affected |
|------------------------------------|------------------------------|---------------------|----------------------|
| <b>Placebo (n=5)</b>               |                              |                     |                      |
| Common cold                        | 0                            | 2                   | 2                    |
| Cervical cell dysplasia            | 0                            | 1                   | 1                    |
| GFR <80                            | 0                            | 1                   | 1                    |
| Pain in stomach                    | 0                            | 1                   | 1                    |
|                                    |                              |                     |                      |
| <b>Active (n=10)</b>               |                              |                     |                      |
| Common cold                        | 0                            | 9                   | 7                    |
| Traumatic limb injury              | 0                            | 1                   | 1                    |
| Anaemia                            | 0                            | 1                   | 1                    |
| Stomach flu                        | 0                            | 1                   | 1                    |
| Decreased Cystatin C               | 0                            | 1                   | 1                    |
| Pregnancy (SAE)                    | 0                            | 1                   | 1                    |
| Prolonged QTc time                 | 0                            | 1                   | 1                    |
| Enlarged Lymph nodes               | 0                            | 1                   | 1                    |
| GFR <80                            | 0                            | 1                   | 1                    |
| Cervical intraepithelial neoplasia | 0                            | 1                   | 1                    |
| Tiredness                          | 0                            | 1                   | 1                    |

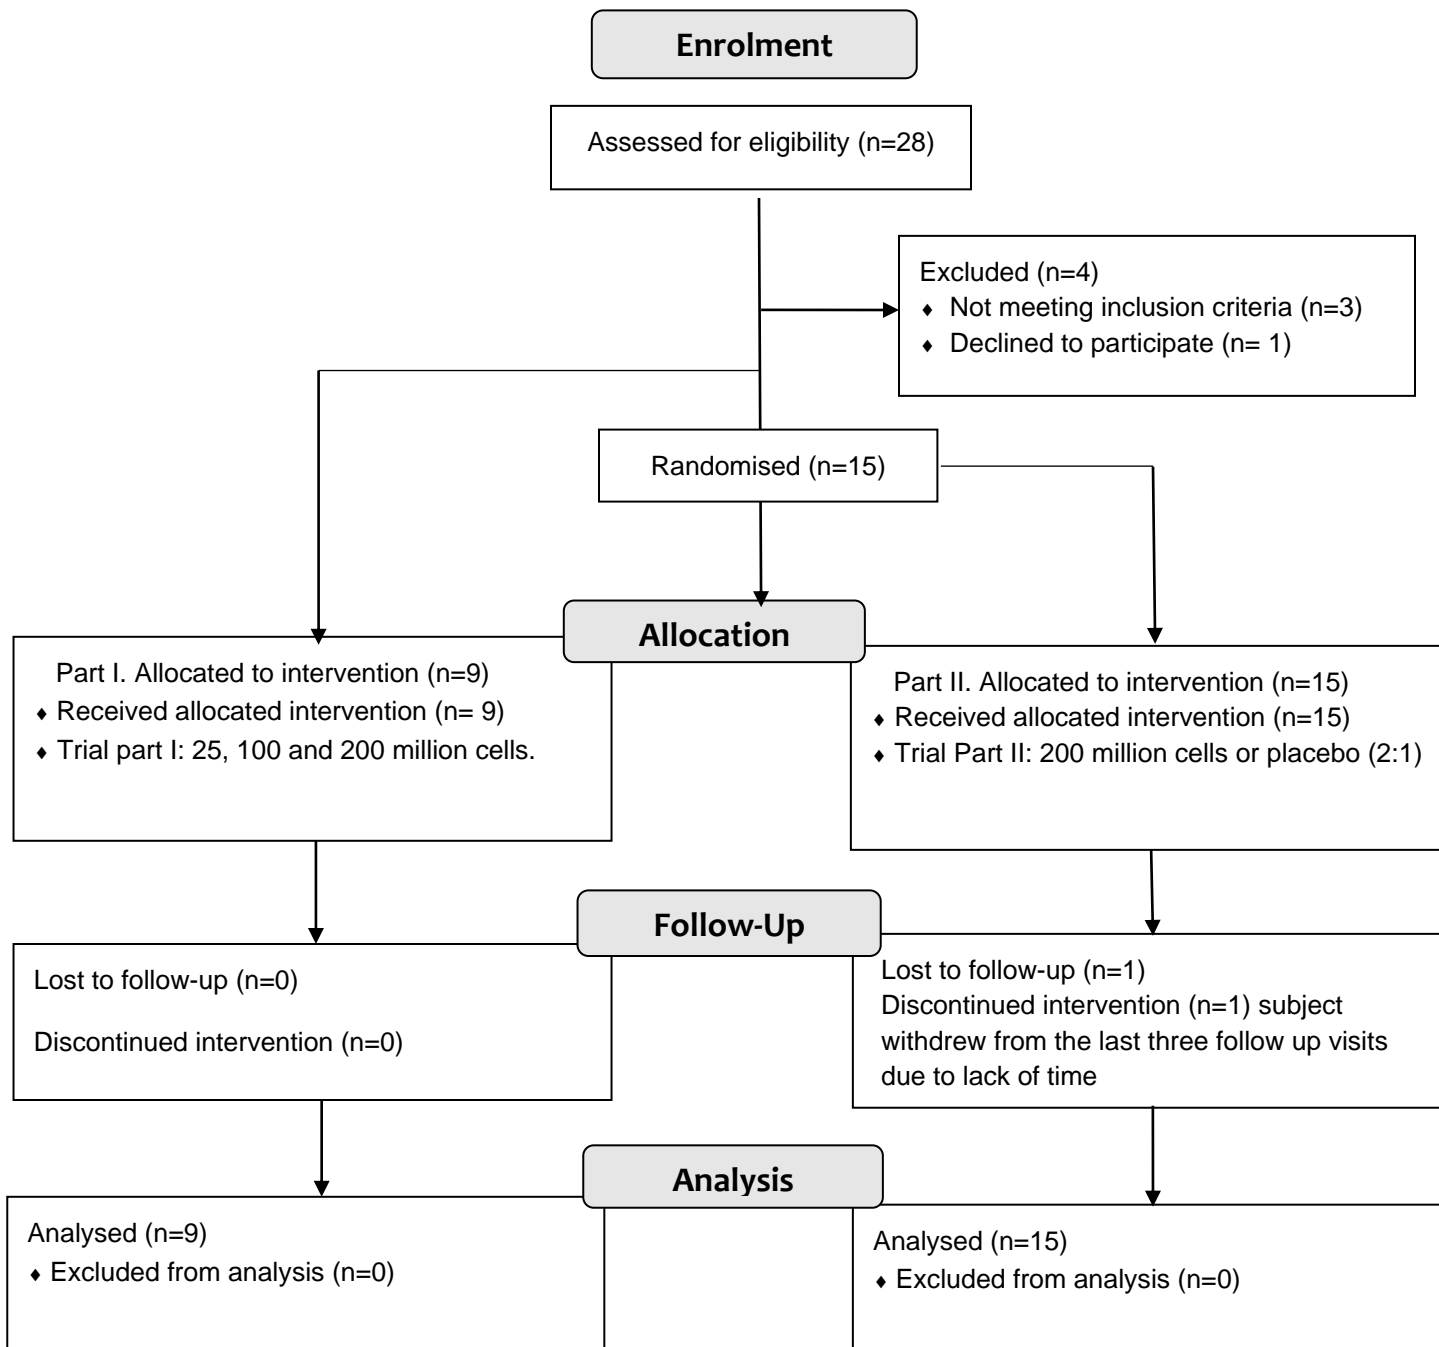

**ESM Fig.1:** Flow diagram of subjects in the clinical trial.

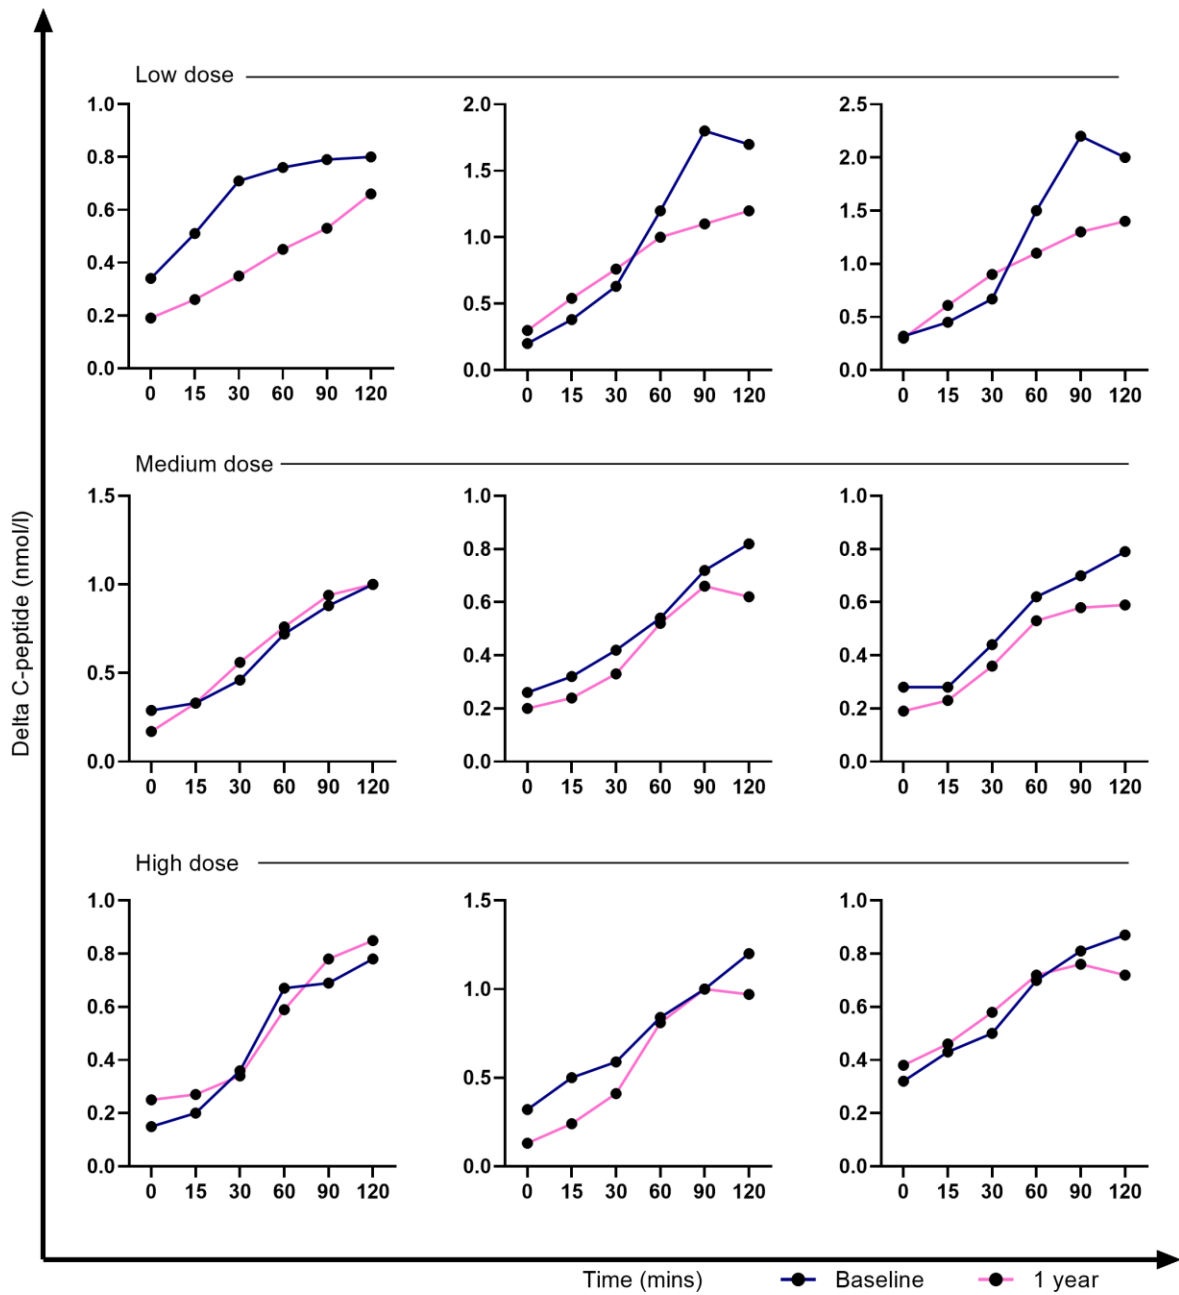

**ESM Fig.2:** C-peptide concentration during MMTT for each subject in part A. Comparison between baseline (before treatment) and 12 months after treatment

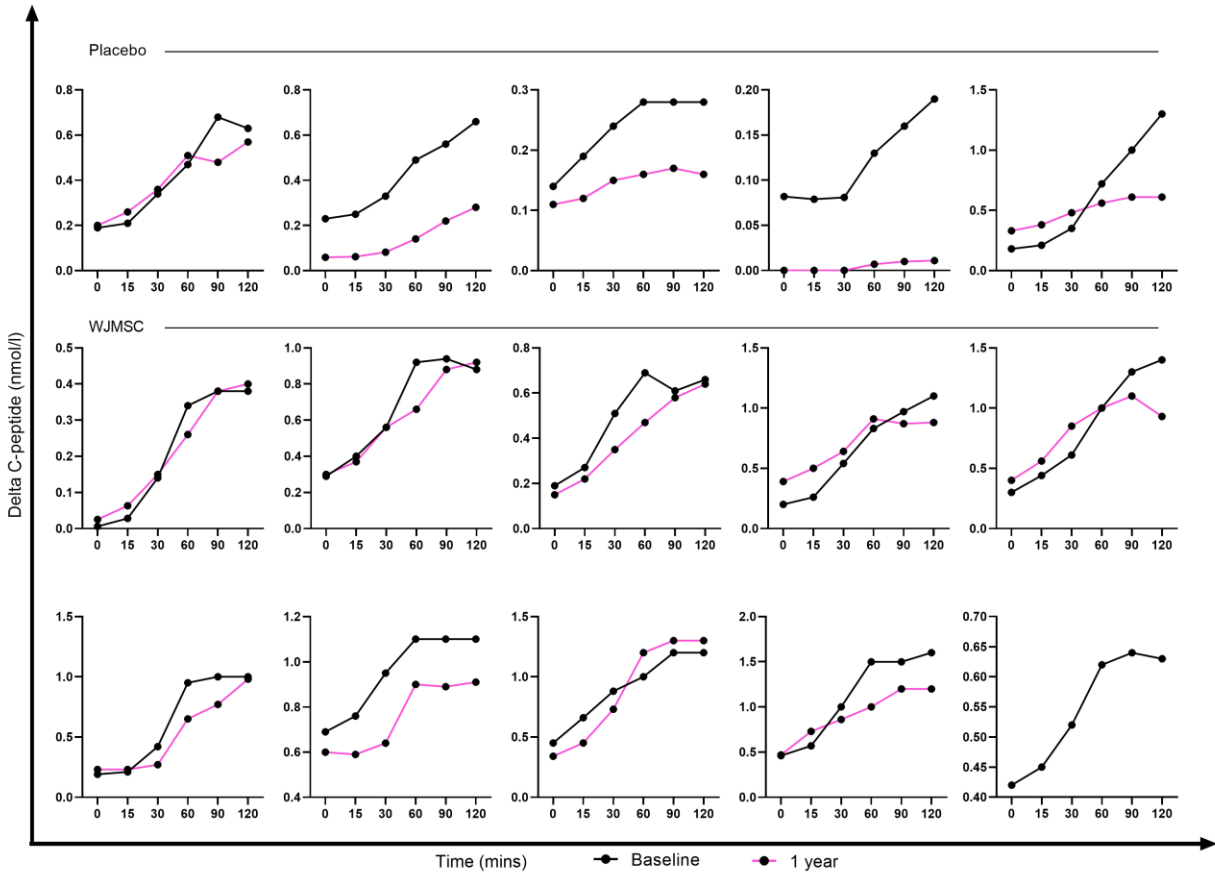

**ESM Fig.3:** C-peptide concentration during MMTT for each subject in part B. Comparison between baseline (before treatment) and 12 months after treatment
